# Supplementary material
Source: publisher figshare collection journal article supplement (https://gsajournals.figshare.com/ndownloader/files/13530191)

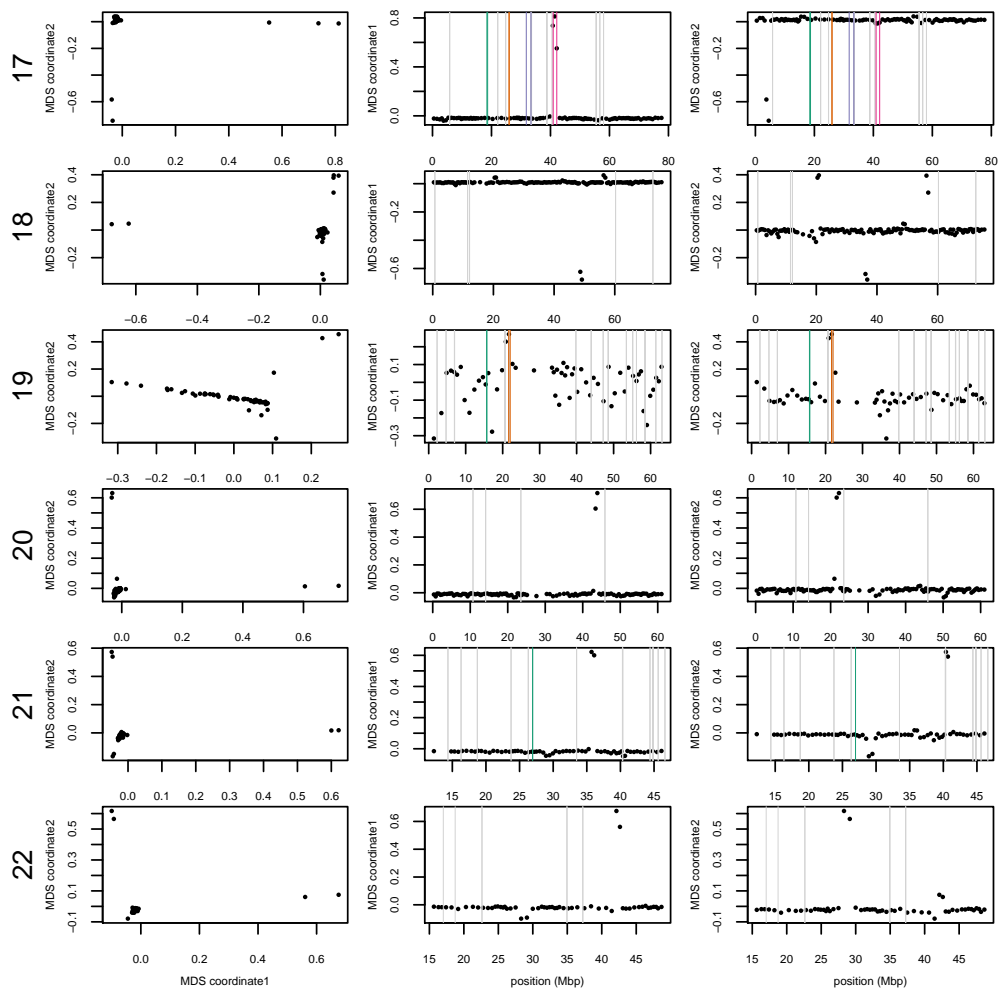

Figure S14: MDS plots for human chromosomes 17-22, as in Supplementary Figure S12.

Supplement: Supplementary file 1 [file 13530191]
